# Supplementary material for: pH and reduction dual responsive cross-linked polyurethane micelles as an intracellular drug delivery system
Source: Royal Society of Chemistry journal article supplement (doi:10.1039/c4ra14221g), 2014-01-01
Supplement: c4ra14221g1.pdf [file c4ra14221g1.pdf]

## Supporting Information:

### **pH and reduction dual responsive cross-linked polyurethane micelles as an intracellular drug delivery system**

Shuangjiang Yu, Chaoliang He\*, Qiang Lv, Hai Sun and Xuesi Chen

*Key Laboratory of Polymer Ecomaterials, Changchun Institute of Applied Chemistry, Chinese Academy of Sciences, Changchun 130022, P. R. China. E-mail: clhe@ciac.ac.cn; Fax: +86 431 85262116; Tel: +86 43185262116*

**Table S1.** Synthesis parameters and characterization data for the polyurethane block copolymers.

| Sample                                       | Feed ratio                         | Ratios in Polymer <sup>a</sup>     | Mn <sup>b</sup> (g/mol) | PDI <sup>b</sup> | PEG content <sup>a</sup><br>(wt%) | pK <sub>a</sub> |
|----------------------------------------------|------------------------------------|------------------------------------|-------------------------|------------------|-----------------------------------|-----------------|
|                                              | PEG/O-DTT/HEP/HDI<br>(molar ratio) | PEG/O-DTT/HEP/HDI<br>(molar ratio) |                         |                  |                                   |                 |
| PU( PEG- <i>co</i> -HEP- <i>co</i> -O-DTT)-1 | 0.90/1.0/4.0/5.9                   | 0.74/1.0/2.4/4.1                   | 32,000                  | 1.49             | 53.8                              | 6.6             |
| PU( PEG- <i>co</i> -HEP- <i>co</i> -O-DTT)-2 | 0.38/1.0/1.0/2.4                   | 0.33/1.0/0.98/2.3                  | 23,800                  | 1.23             | 49.2                              | 6.7             |
| PU( PEG- <i>co</i> -HEP- <i>co</i> -O-DTT)-3 | 0.90/4.0/1.0/5.9                   | 0.74/2.6/1.0/4.4                   | 30,000                  | 1.38             | 52.8                              | 6.6             |

<sup>a</sup> Determined by NMR. <sup>b</sup> Obtained by GPC.

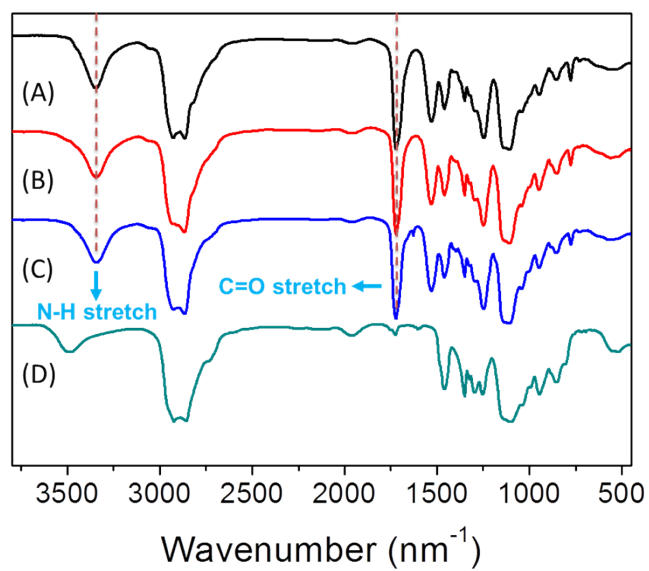

**Figure S1.** FT-IR Spectra of PU(PEG-*co*-HEP-*co*-O-DTT)-1 (A) , -2 (B) , -3 (C) and PEG-2000 (D).

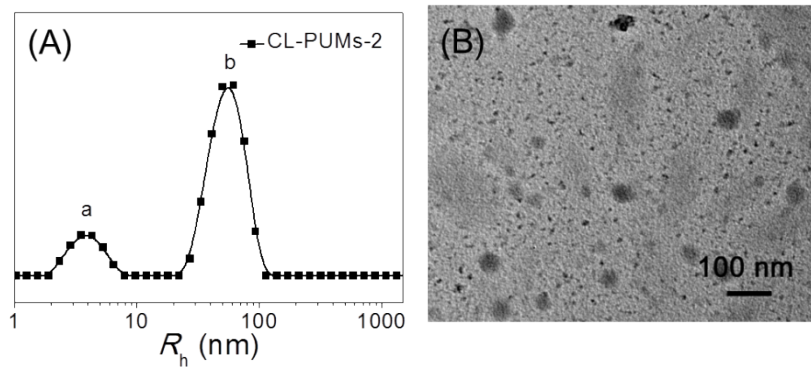

**Figure S2.** (A) The hydrodynamic radii ( $R_h$ ) of CL-PUMs-2 in DMF solution which contained a main peak around 60 nm (a) and a small peak around 5 nm for the incomplete crosslinking copolymers (b); (B) TEM image taken after drying of the CL-PUMs-2 solution in DMF.
